# Supplementary material for: A balanced cation exchange reaction toward highly uniform and pure phase FA1−xMAxPbI3 perovskite films
Source: Royal Society of Chemistry journal article supplement (doi:10.1039/c6ta05727f), 2016-01-01
Supplement: c6ta05727f1.pdf [file c6ta05727f1.pdf]

## Supporting Information

# Balanced Cation Exchange Reaction toward Highly Uniform and Pure Phase $\text{FA}_{1-x}\text{MA}_x\text{PbI}_3$ Perovskite Films

Fuxiang Ji<sup>1,2,†</sup>, Li Wang<sup>1,†</sup>, Shuping Pang<sup>2</sup>, Peng Gao<sup>3</sup>, Hongxia Xu<sup>2</sup>, Guangwen  
Xie<sup>1,\*</sup>, Jidong Zhang<sup>4,\*</sup>, Guanglei Cui<sup>2,\*</sup>

<sup>1</sup>Qingdao University of Science and Technology, 266042, P.R. China

<sup>2</sup>Qingdao Institute of Bioenergy and Bioprocess Technology, Chinese Academy of  
Sciences, Qingdao 266101, P.R. China

<sup>3</sup>Xiamen Institute of rare earth materials, Chinese Academy of Sciences, Xiamen,  
361021, P.R. China

<sup>4</sup>Changchun Institute of Applied Chemistry, Chinese Academy of Sciences,  
Changchun, 130022, P.R. China

† These authors contributed equally to this work

\*email: xiegw@qust.edu.cn, jdzhang@ciac.ac.cn, cuigl@qibebt.ac.cn

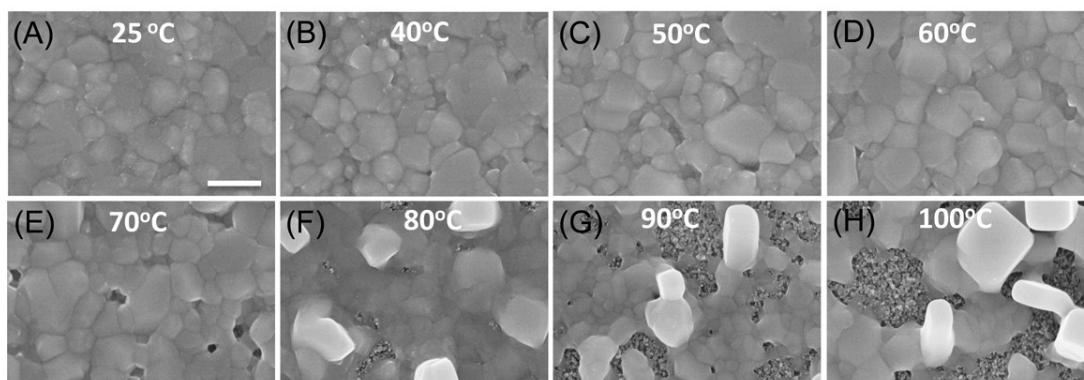

Figure S1. SEM images of  $\text{FA}_x\text{MA}_{1-x}\text{PbI}_3$  perovskite films obtained at different exchange temperature for 5 min.

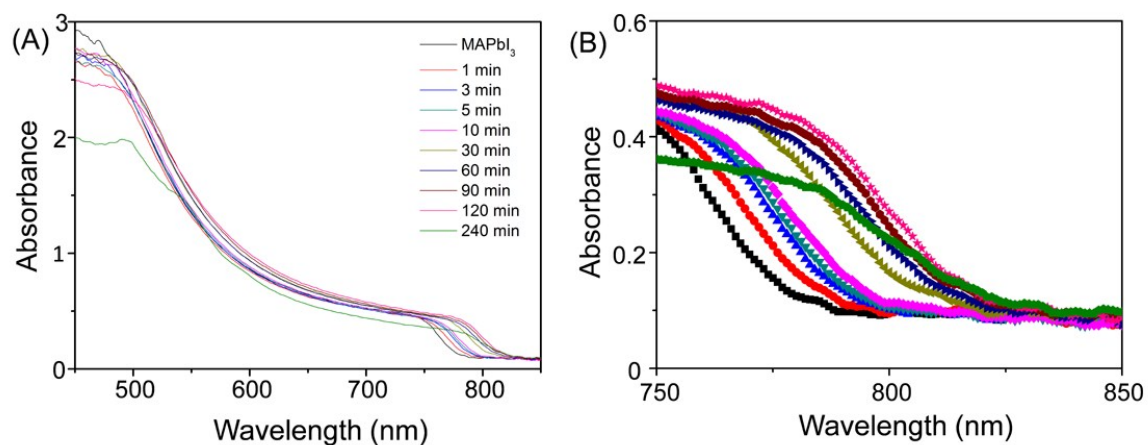

Figure S2. UV-Vis absorption spectra of the  $\text{FA}_x\text{MA}_{1-x}\text{PbI}_3$  perovskite film dipped for different time at RT (A) and the detailed absorption property around the absorption edge (B).

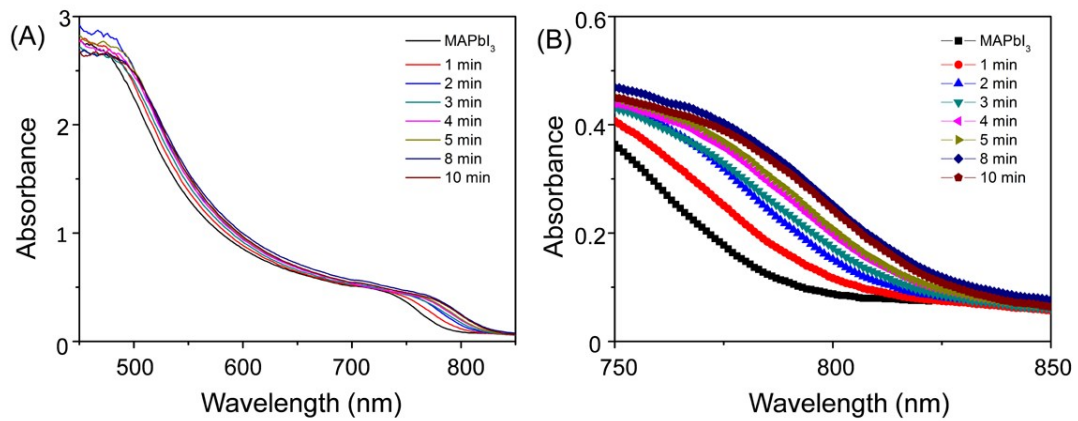

Figure S3. UV-Vis absorption spectra of the FA<sub>x</sub>MA<sub>1-x</sub>PbI<sub>3</sub> perovskite film exchanged for different time at 60 °C (A) and the detailed absorption property around the absorption edge (B).

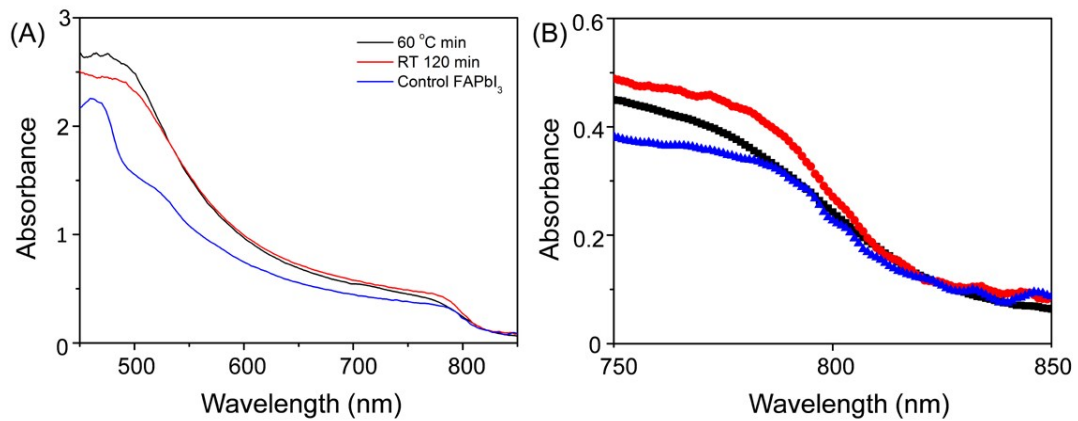

Figure S4. UV-Vis absorption spectra of the FA based perovskite films fabricated with different methods.

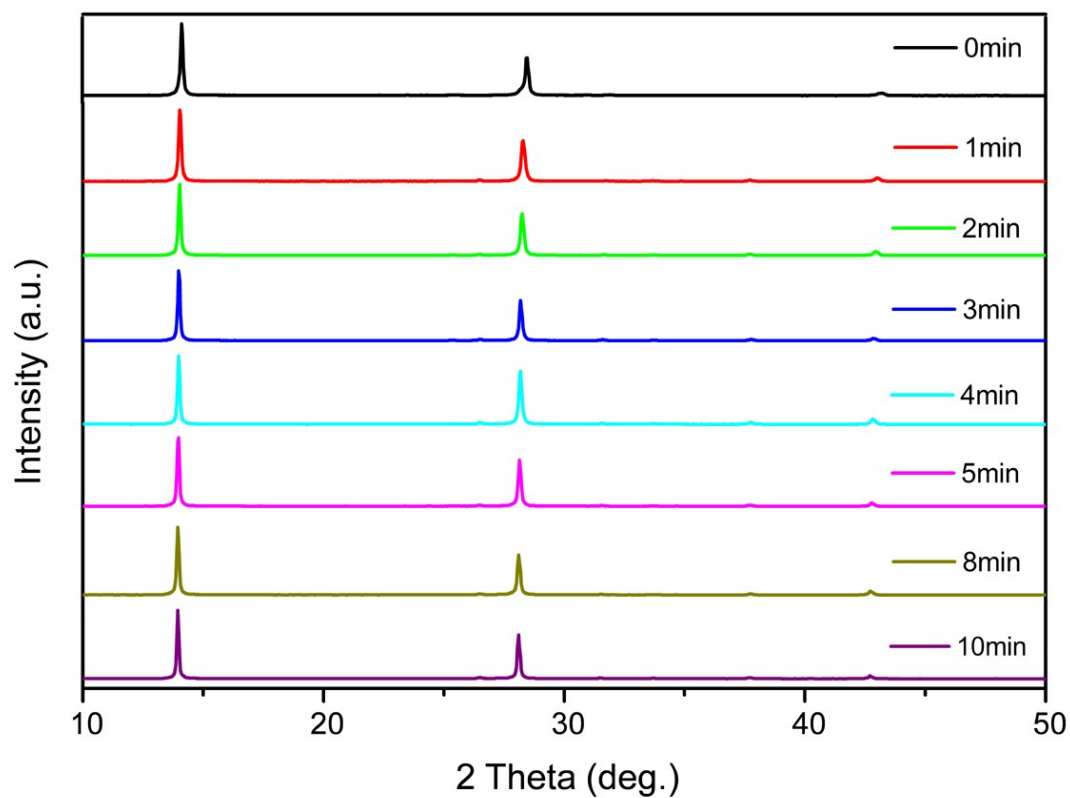

Figure S5. XRD patterns of the FA<sub>x</sub>MA<sub>1-x</sub>PbI<sub>3</sub> perovskite film exchanged at 60 °C for different time.

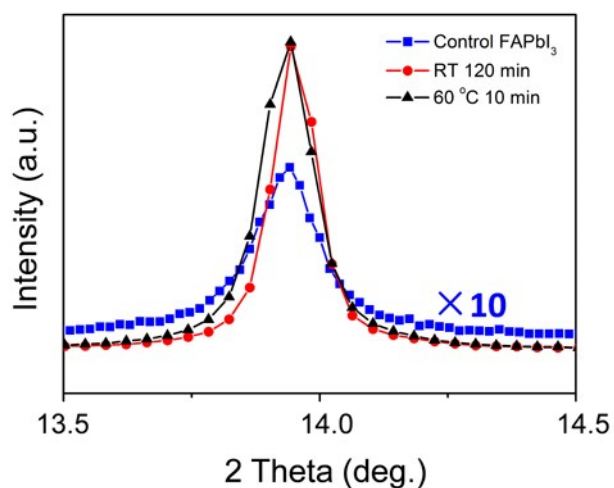

Figure S6. XRD patterns and FA based perovskite films exchanged at RT, 60 °C and the reference FAPbI<sub>3</sub> films, respectively.

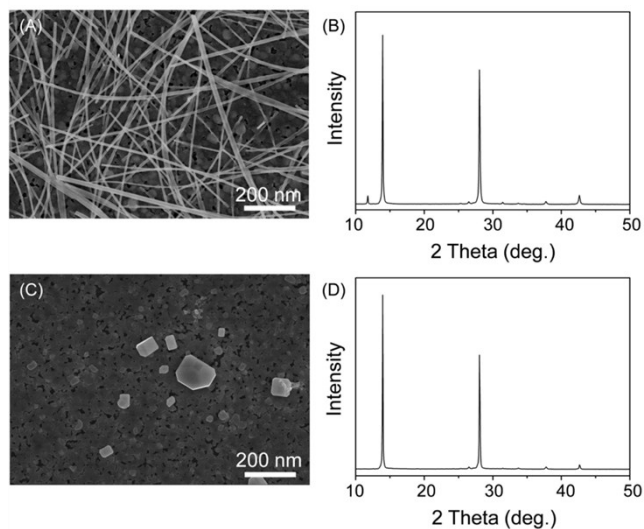

Figure S7. SEM images and corresponding XRD patterns of the  $\text{FA}_x\text{MA}_{1-x}\text{PbI}_3$  perovskite film exchanged at RT (A, B) and 60 °C (C, D) for 240 min, respectively.

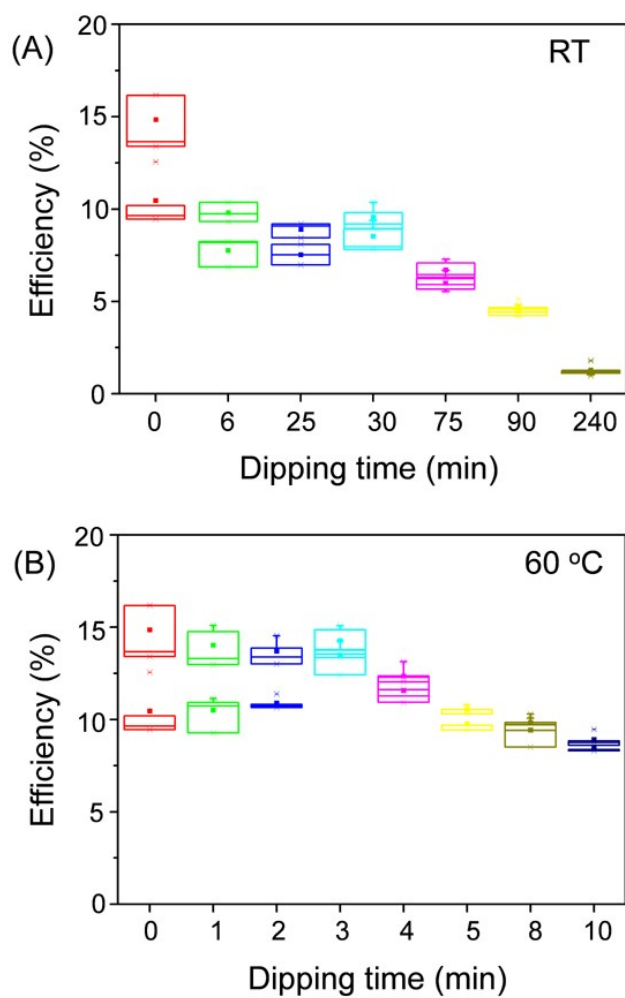

Figure S8. The efficiency distribution of the  $\text{FA}_x\text{MA}_{1-x}\text{PbI}_3$  perovskite solar cells fabricated by the exchanging method at RT (A) and 60 °C for different time, respectively. The efficiencies are obtained with both the reverse and forward scan.

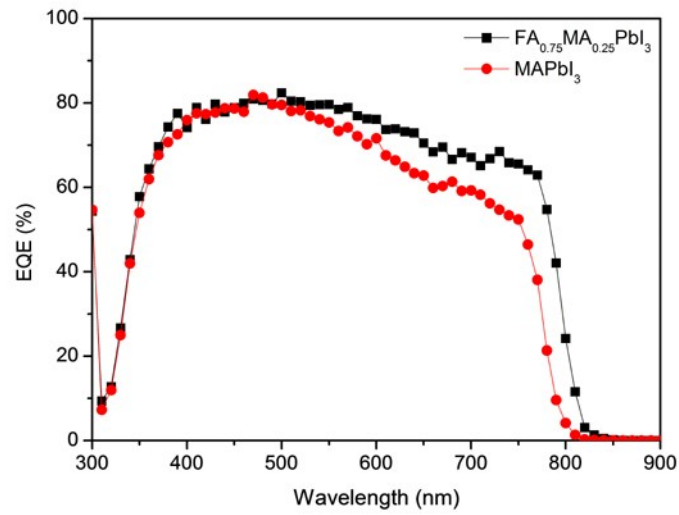

Figure S9. The EQE curves of  $\text{MAPbI}_3$  and  $\text{FA}_{0.75}\text{MA}_{0.25}\text{PbI}_3$  solar cells.
